# Supplementary material for: Spike transmission failures in axons from mouse cortical pyramidal neurons in vivo
Source: PubMed Central journal article supplement — bioRxiv. 2024 Jan 30:2024.01.29.577733. Preprint. [Version 1] doi: 10.1101/2024.01.29.577733 (PMC10862735; doi:10.1101/2024.01.29.577733), 2024-01-30
Supplement: NIHPP2024.01.29.577733v1-supplement-1.pdf [file NIHPP2024.01.29.577733v1-supplement-1.pdf]

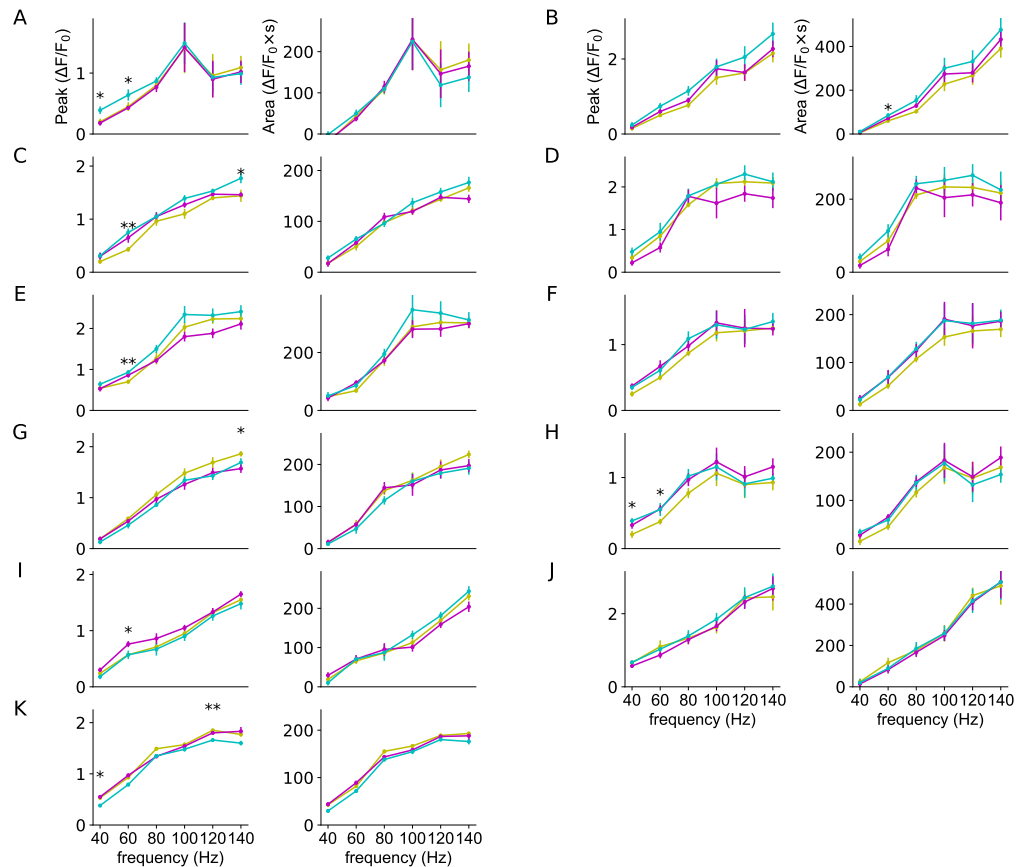

**Figure 3—figure supplement 1. Spike propagation at different branchpoints.** A-J: Examples of reliable propagation in both peak (left columns) and integrated fluorescence (right columns). Statistical definition of propagation or failure explained in text. Parent branch in yellow, secondary branches in cyan and magenta. Vertical lines show standard error. Asterisks indicate statistical significance differences between the three branches; Kruskal-Wallis H-test.

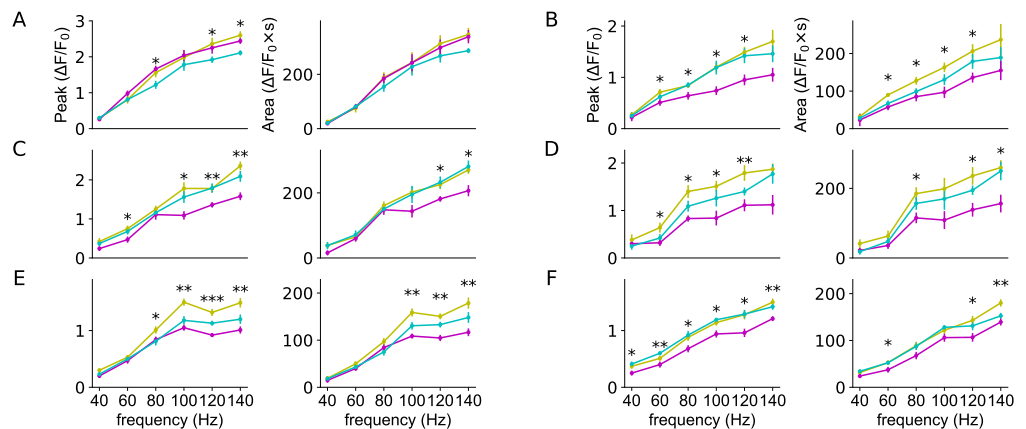

**Figure 4—figure supplement 1. Spike failures at different branchpoints.** A-F: Examples of High-frequency propagation failures in both peak (left columns) and integrated fluorescence (right columns). Statistical definition of propagation or failure explained in text. Parent branch in yellow, secondary branches in cyan and magenta. Vertical lines show standard error. Asterisks indicate statistical significance differences between the three branches; Kruskal-Wallis H-test.
